# Supplementary material for: Host–guest interaction-directed strategy for managing mechanochromic luminescence behavior by modulating molecular packing and conformation
Source: Royal Society of Chemistry journal article supplement (doi:10.1039/d1tc04433h), 2021-01-01
Supplement: d1tc04433h1.pdf [file d1tc04433h1.pdf]

Electronic Supplementary Material (ESI) for Journal of Materials Chemistry C.  
This journal is © The Royal Society of Chemistry 2021

## Electronic Supplementary Information (ESI)

# Host-Guest Interaction-Directed Strategy for Managing Mechanochromic Luminescent Behavior by Modulating Molecular Packing and Conformation

Xie Han,<sup>\*a,b</sup> DongDong Sun,<sup>a</sup> Shi Tang,<sup>a</sup> Yong Wu,<sup>a</sup> Luyao Wang,<sup>a</sup> Xiongzhi Zhang,<sup>a,b</sup> and Simin Liu<sup>\*a,b</sup>

*E-mail:* [hanxie@wust.edu.cn](mailto:hanxie@wust.edu.cn); [liusimin@wust.edu.cn](mailto:liusimin@wust.edu.cn)

<sup>a</sup> School of Chemistry and Chemical Engineering, Wuhan University of Science and Technology,  
Wuhan 430081 (P.R. China)

<sup>b</sup> The State Key Laboratory of Refractories and Metallurgy, Wuhan University of Science and Technology,  
Wuhan 430081 (P.R. China)

| Table of Contents                                                                                                       | Page   |
|-------------------------------------------------------------------------------------------------------------------------|--------|
| Table of Contents                                                                                                       | S2     |
| General Information                                                                                                     | S3     |
| Synthesis and Characterization                                                                                          | S3     |
| UV/vis and Fluorescence spectra for <b>NBDP</b> in different solvents                                                   | S3     |
| FTIR and absorption spectra for <b>NBDP</b> in the absence and presence of CB[8]                                        | S3-4   |
| DFT calculation for <b>CB[8]•NBDP<sub>2</sub></b>                                                                       | S4-5   |
| Absorption spectra of <b>NBDP</b> in the presence of CB[6], PXRD patterns                                               | S5     |
| Fluorescence spectra of <b>NBDP</b> and <b>NBDP@CB[8]</b> powder, table summarizing the fluorescence, PXRD patterns     | S6-7   |
| Fluorescence spectra and intermolecular interactions in <b>NBDP-O</b> , <b>NBDP-G</b> and <b>CB[8]•NBDP<sub>2</sub></b> | S7-11  |
| NMR and EI/MS spectra of <b>NBDP</b> , table summarizing the main crystallographic parameters                           | S11-14 |

### General Information.

CB[8] were prepared by the corresponding literature procedures.<sup>1</sup> Other compounds used in this study were purchased from commercial suppliers and were used without further purification. NMR spectra (<sup>1</sup>H and <sup>13</sup>C) were collected on Agilent 600 MHz DD2 spectrometers. EI-MS was obtained using Thermo scientific DSQII. UV/Vis were performed on a SHIMADZU UV-3600 instrument with 1 cm pathlength cells at 298 K. Fluorescence spectra were measured on a PerkinElmer LS-55 machine. The X-ray intensity data were measured on a Bruker APEX-II CCD system equipped with a graphite monochromator. PXRD data were collected in a Bruker D8 X-ray diffractometer using the Cu K $\alpha$  line ( $\lambda = 1.5418 \text{ \AA}$ ). The quantum chemistry calculation was performed on Gaussian 16 (M06-2X/6-311G(d) basis set) software package. The interaction region plotted by independent gradient model (IGM) was analyzed by means of the Multiwfn package<sup>2</sup> and VMD software.<sup>3</sup>

### Synthesis and Characterization:

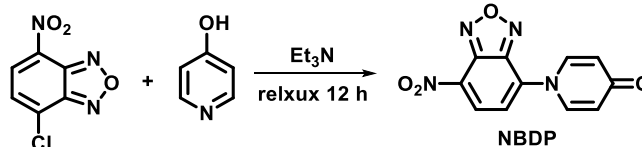

**Synthesis of NBDP:** 4-chloro-7-nitro-2,1,3-benzoxadiazole (100 mg, 0.5 mmol), 4-Pyridinol (57 mg, 0.6 mmol) and Et<sub>3</sub>N (0.1 mL) were dissolved in dry acetonitrile (20 mL) under a nitrogen atmosphere. The reactants were stirred and heated at reflux for 12 h. The mixture was then evaporated and purified by means of column chromatography (DCM : MeOH = 50:1,  $R_f = 0.15$ ), as a yellow solid (62 mg, 49%). <sup>1</sup>H NMR (600 MHz, D<sub>2</sub>O):  $\delta$  8.86(d,  $J = 6 \text{ Hz}$ , 1H), 8.48(d,  $J = 12 \text{ Hz}$ , 1H), 7.99 (d,  $J = 6 \text{ Hz}$ , 2H), 6.80 (d,  $J = 6 \text{ Hz}$ , 2H). <sup>13</sup>C NMR (150 MHz, CDCl<sub>3</sub>)  $\delta$  (ppm): 178.94, 145.48, 143.77, 137.55, 136.51, 130.86, 120.45, 118.83. EI-MS:  $m/z = 257.95 [M]^+$ ; calculated exact mass: 258.04.

**Synthesis of NBDP@CB[8]:** CB[8] solid (10 mg) was added to the aqueous solution of **NBDP** (1 mM, 1 mL) and followed by ultrasonic treatment for 5 min. The precipitate was centrifuged at 10000 rpm for 2 min and washed with DI water for 3 times, then the separated solid was dried at 60 °C.

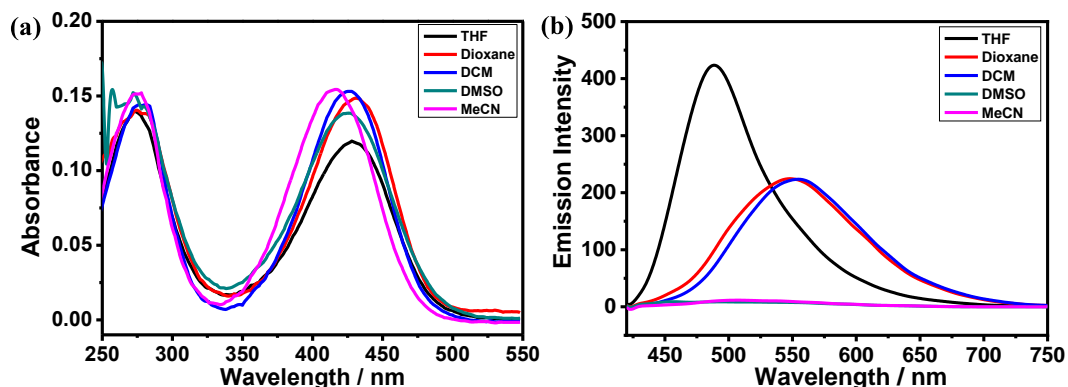

Figure S1. (a) UV/vis absorption and (b) fluorescence spectra of **NBDP** in different solvents (10  $\mu\text{M}$ ,  $\lambda_{\text{ex}} = 420 \text{ nm}$ ).

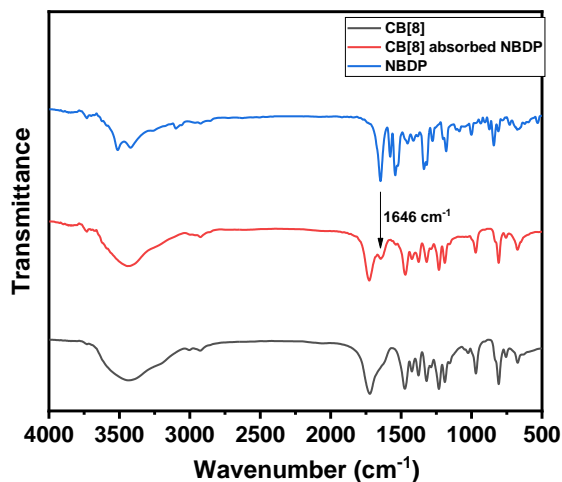

Figure S2 FTIR spectra of CB[8], **NBDP**, and CB[8] that absorbed **NBDP**.

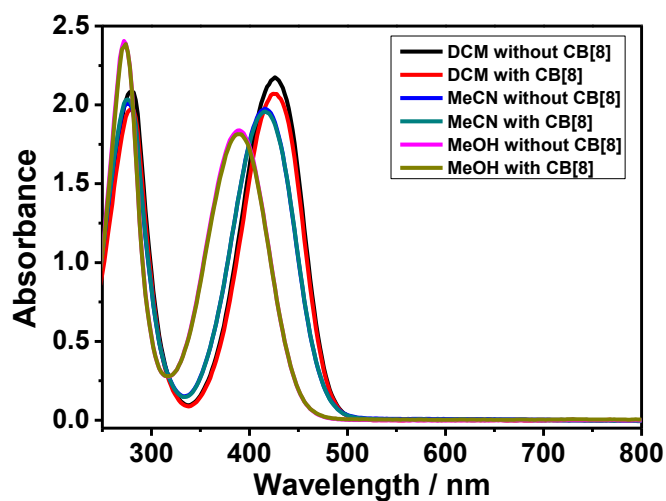

Figure S3 Absorption spectra change of **NBDP** in different solvents in the absence and presence of **CB[8]**.

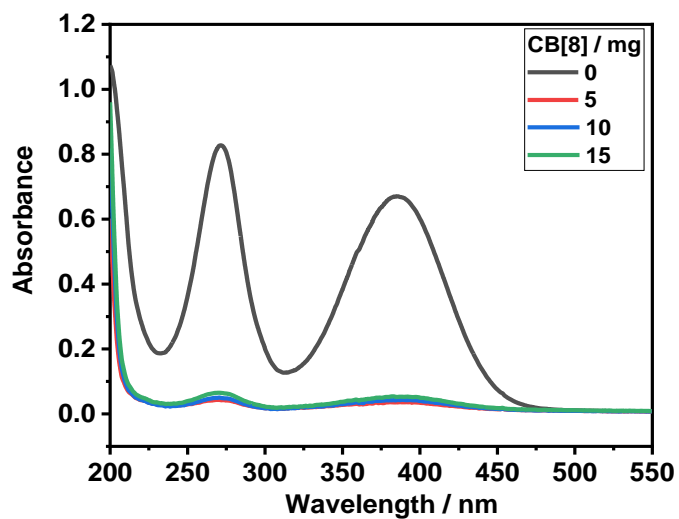

Figure S4 Absorption spectra of **NBDP** aqueous solution (1 mM, 1 mL) in the absence and presence of different equivalents of **CB[8]**.

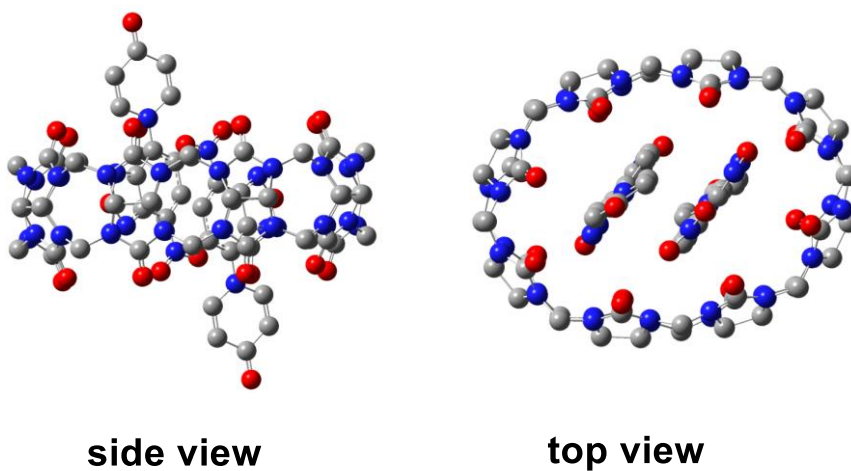

Figure S5. Molecular structures optimized by DFT calculation for **CB[8]·NBDP<sub>2</sub>**.

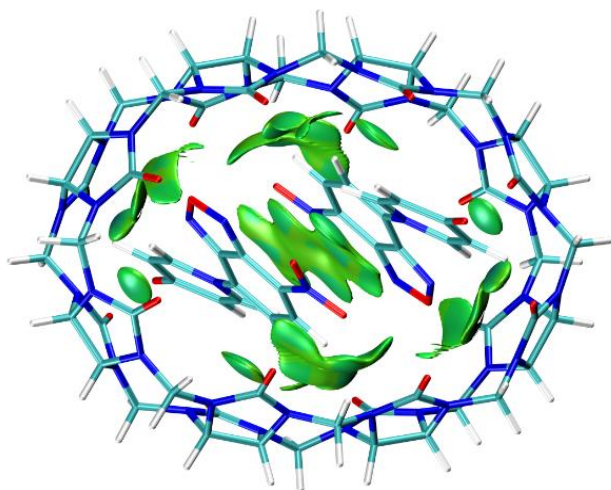

**Figure S6** Independent Gradient Model (IGM) analysis of **CB[8]•NBDP<sub>2</sub>**. Green surfaces represent the van der Waals interaction.

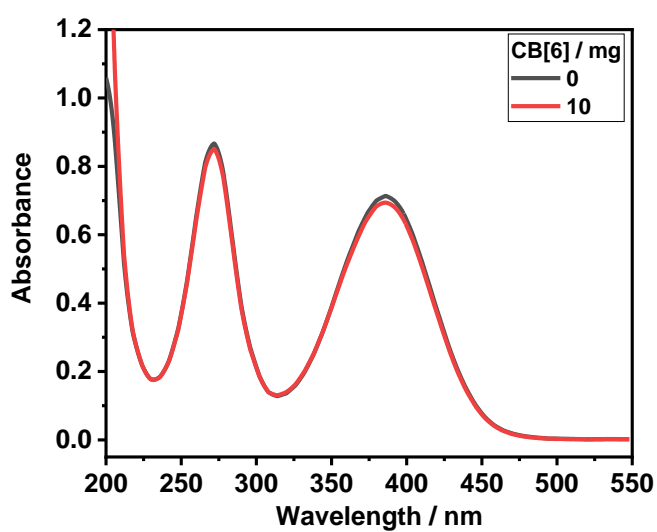

**Figure S7** Absorption spectra of **NBDP** aqueous solution (1 mM, 1 mL) in the absence and presence of **CB[6]**.

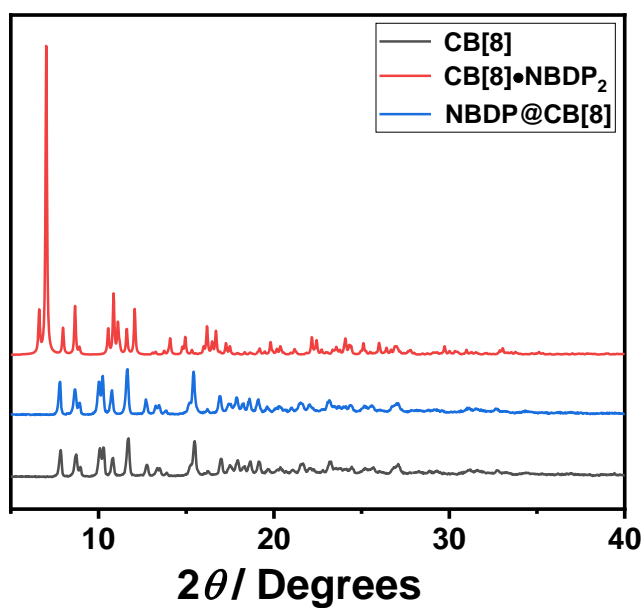

**Figure S8** Powder X-ray diffraction (PXRD) patterns of **CB[8]**, **NBDP@CB[8]** powder and **CB[8]•NBDP<sub>2</sub>** crystal (simulated from crystal structure of **CB[8]•NBDP<sub>2</sub>**).

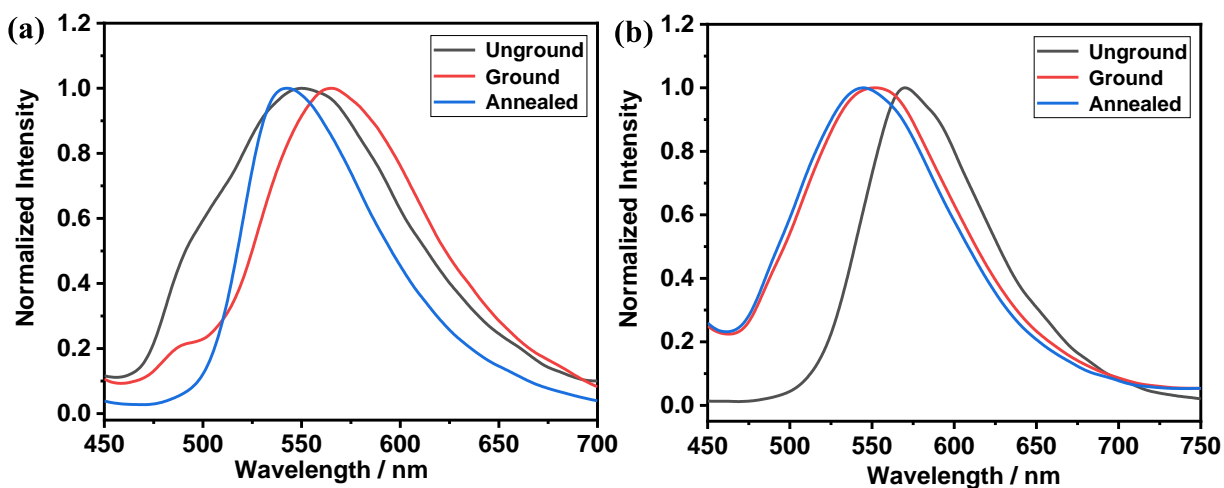

**Figure S9** Normalized fluorescence spectra of (a) **NBDP** and (b) **NBDP@CB[8]** powder under different treatments.

**Table S1** Fluorescence emission maxima of **NBDP** molecule in its different states.

| Compound                      | $\lambda_{em}$ (nm) (pristine) <sup>a</sup> | $\lambda_{em}$ (nm) (ground) | Emission wavelength shift (nm) |
|-------------------------------|---------------------------------------------|------------------------------|--------------------------------|
| <b>NBDP</b>                   | 550                                         | 568                          | 18                             |
| <b>NBDP-G</b>                 | 534                                         | 565                          | 31                             |
| <b>NBDP-O</b>                 | 565                                         | 565                          | 0                              |
| <b>NBDP@CB[8]</b>             | 569                                         | 548                          | -21 <sup>b</sup>               |
| <b>CB[8]-NBDP<sub>2</sub></b> | 569                                         | 579                          | 10                             |

<sup>a</sup>Excited at 400 nm. <sup>b</sup>Blue-shift of the emission after grinding.

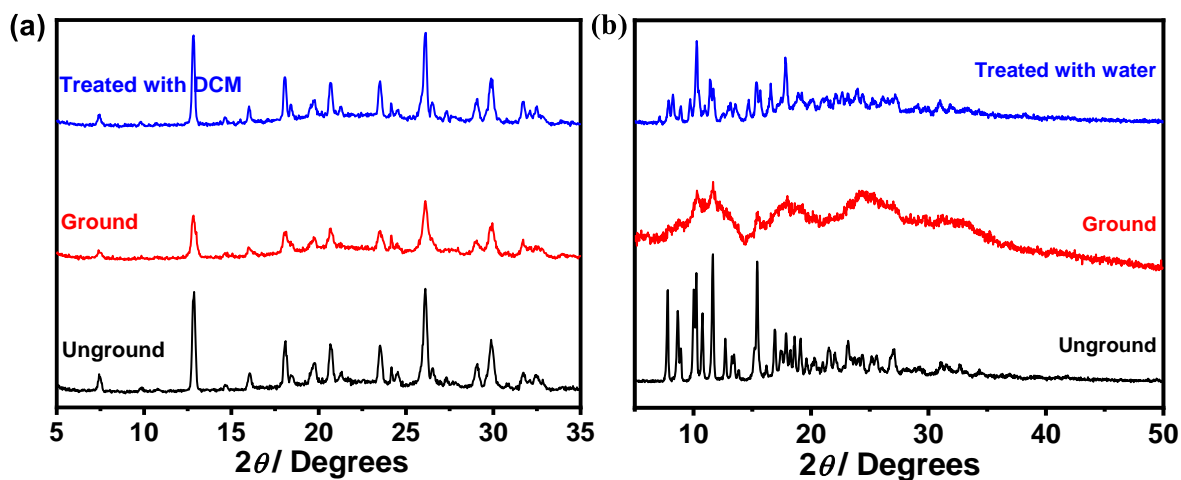

**Figure S10** Powder X-ray diffraction (PXRD) patterns of (a) **NBDP** and (b) **NBDP@CB[8]** powder under different treatments.

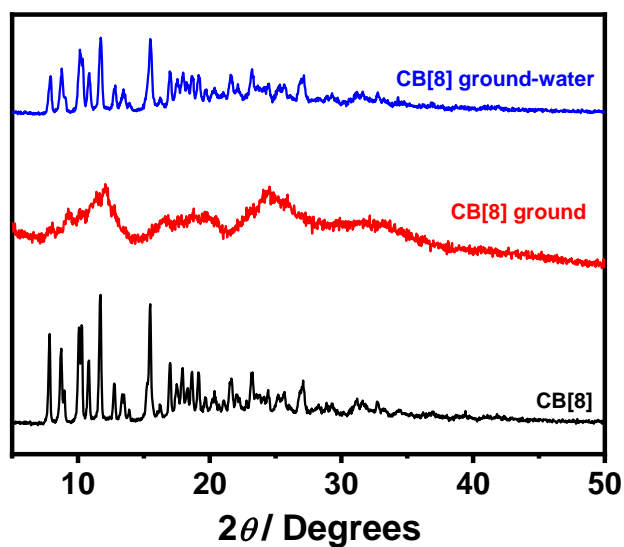

Figure S11 PXRD patterns of CB[8] powder under different treatments.

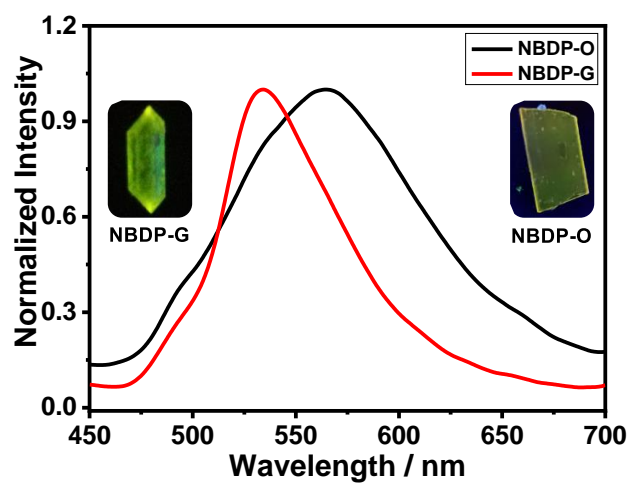

Figure S12 Normalized PL spectra of NBDP-O and NBDP-G. Insets: Fluorescence images of NBDP-O and NBDP-G under UV light (365 nm).

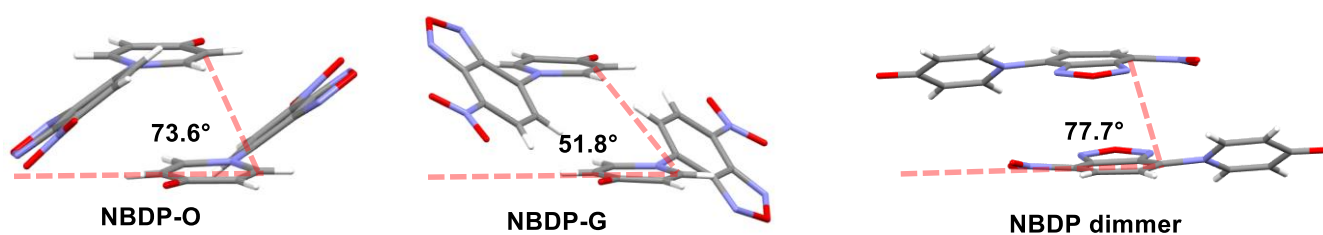

Figure S13 Slip angles of adjacent molecules in NBDP-O and NBDP-G and NBDP dimer in CB[8]·NBDP<sub>2</sub>.

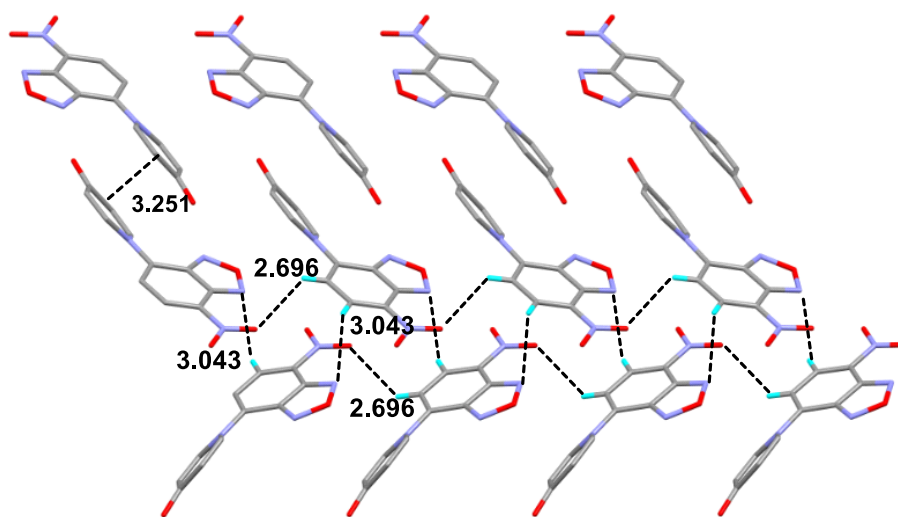

Figure S14  $\pi$ - $\pi$  stacking and intermolecular C-H...N, C-H...O interactions in **NBDP-O**.

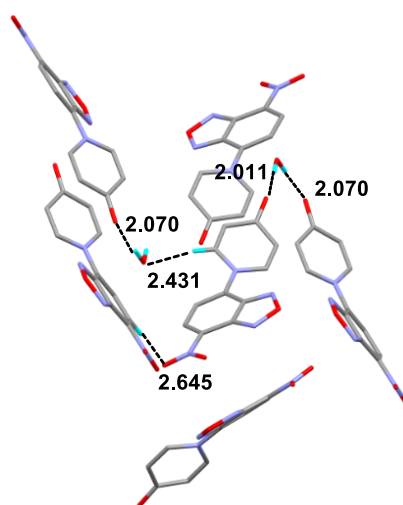

Figure S15 Intermolecular C-H...O and O-H...O interactions in **NBDP-O**.

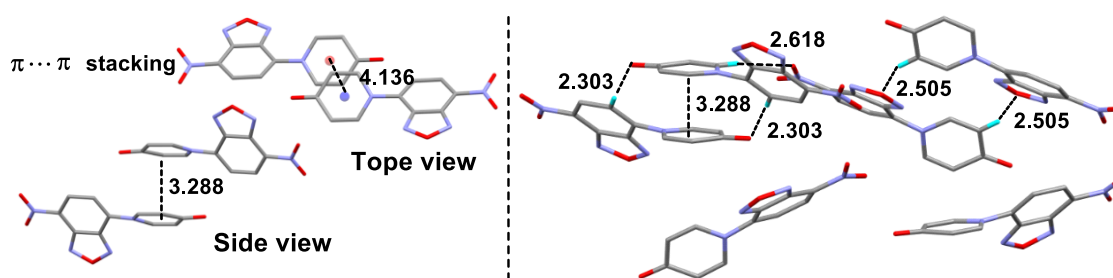

Figure S16  $\pi$ - $\pi$  stacking and multiple kinds of intermolecular C-H...O interactions in **NBDP-G**.

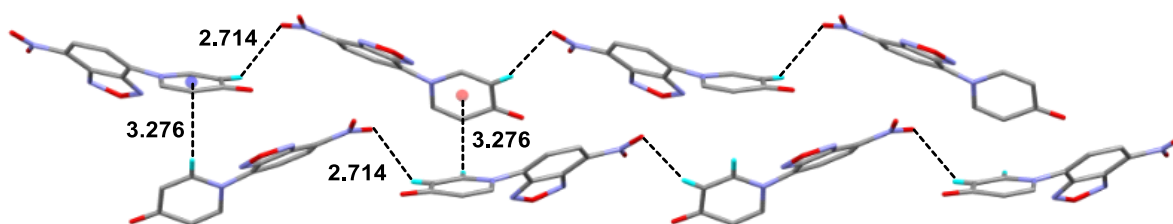

Figure S17 C-H... $\pi$  and intermolecular C-H...O interactions in **NBDP-G**.



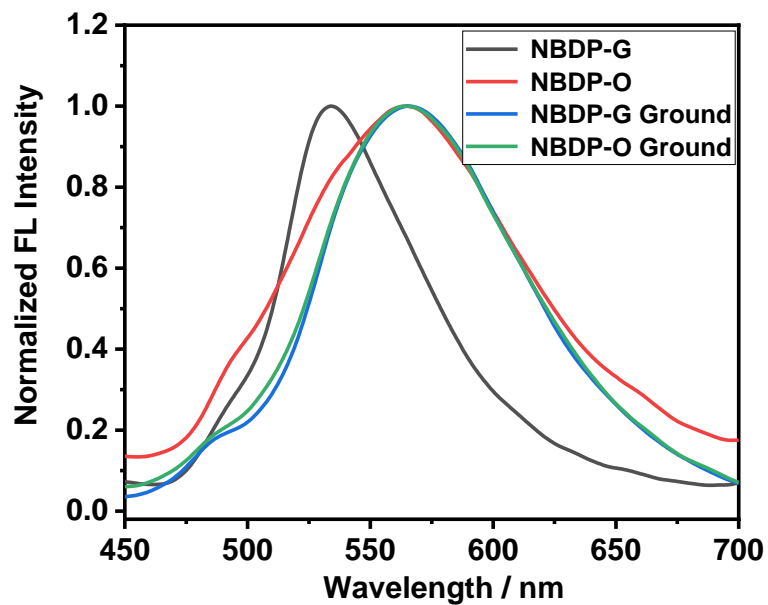

Figure S18 Normalized fluorescence spectra of NBDP-G and NBDP-O crystals before and after grinding.

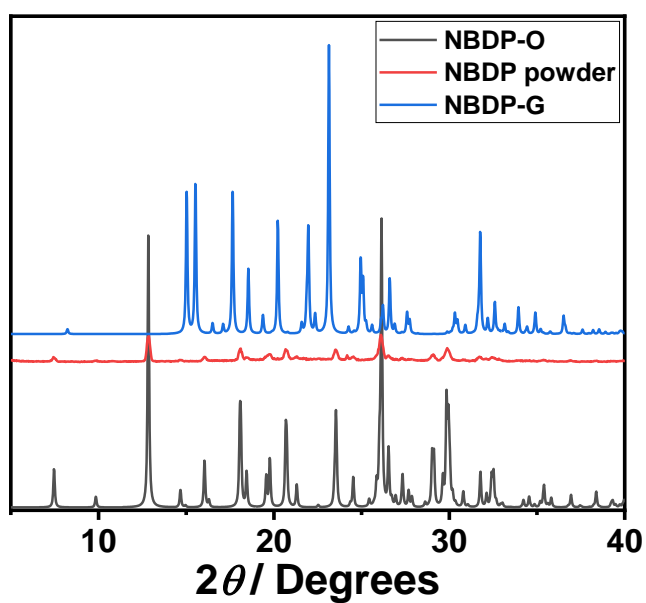

Figure S19 Powder X-ray diffraction (PXRD) patterns of NBDP powder, NBDP-O and NBDP-G crystal (simulated from crystal structure).

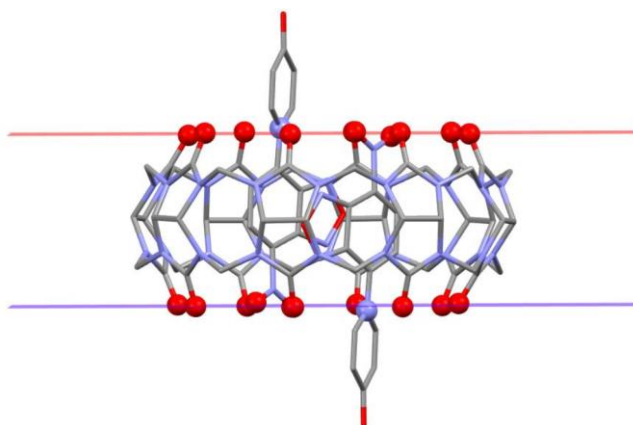

**Figure S20** X-ray crystal structure of **CB[8]·NBDP<sub>2</sub>**.

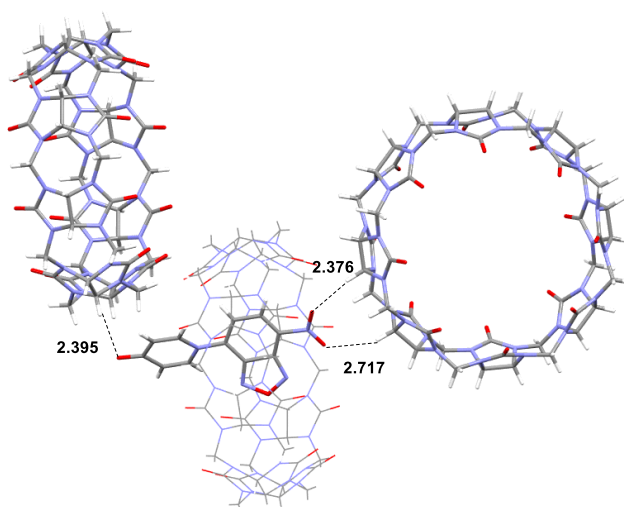

**Figure S21** Intermolecular C-H...O interactions between NBDP and CB[8] host of the **CB[8]·NBDP<sub>2</sub>** neighbors.

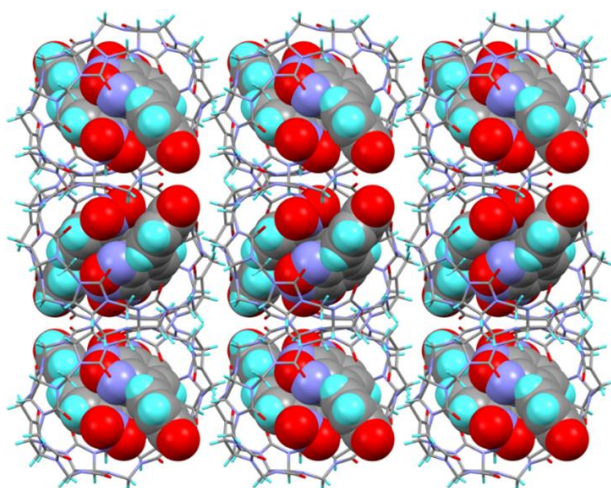

**Figure S22** Molecular packing of **CB[8]·NBDP<sub>2</sub>** complexes.

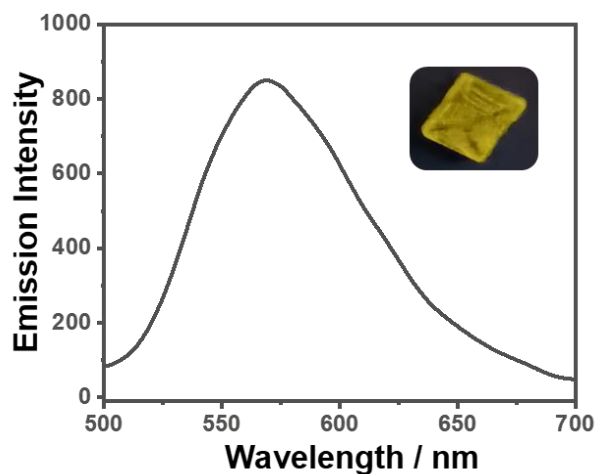

Figure S23 Fluorescence spectra of  $\text{CB}[8]\cdot\text{NBDP}_2$  crystal. Insets: Fluorescence images of  $\text{CB}[8]\cdot\text{NBDP}_2$  crystal under UV light (365 nm).

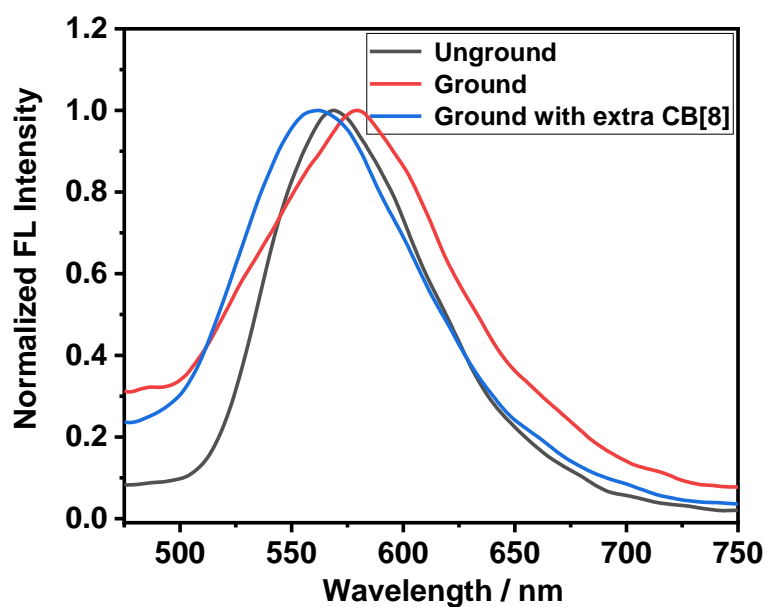

Figure S24 Normalized fluorescence spectra of  $\text{CB}[8]\cdot\text{NBDP}_2$  crystal under different treatments.

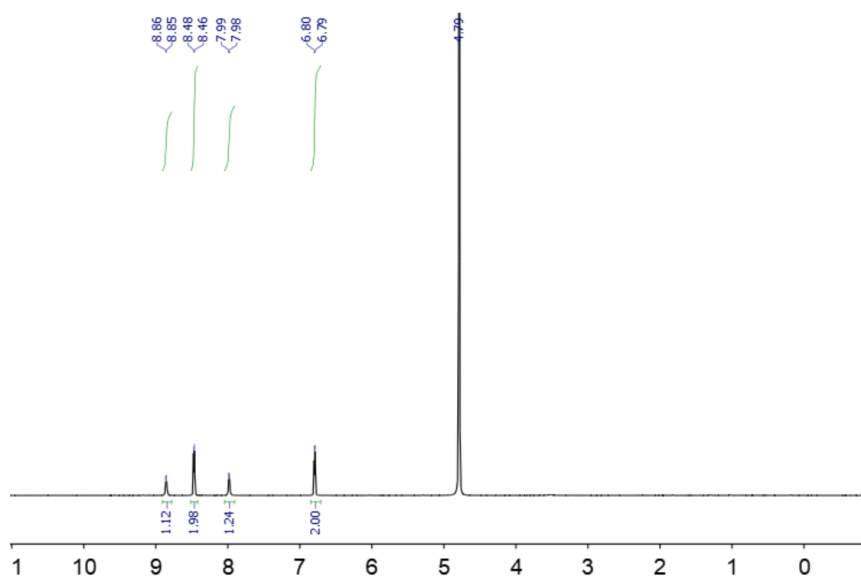

Figure S25  $^1\text{H}$  NMR (600 MHz,  $\text{D}_2\text{O}$ ) of NBDP.

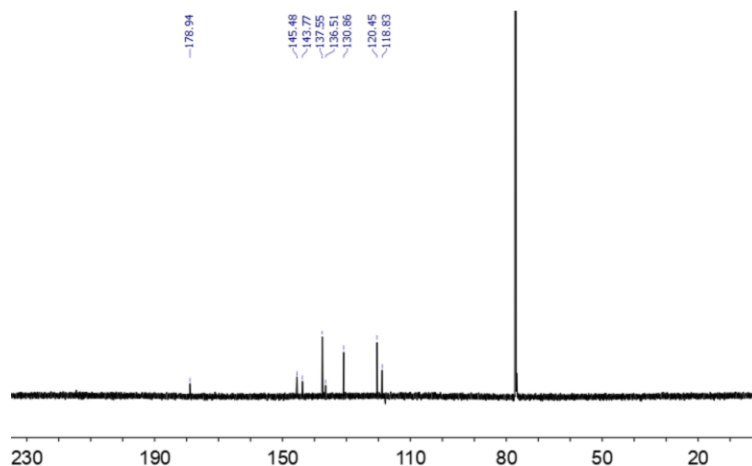

Figure S26  $^{13}\text{C}$  NMR (150 MHz,  $\text{CDCl}_3$ ) spectra of NBD-O.

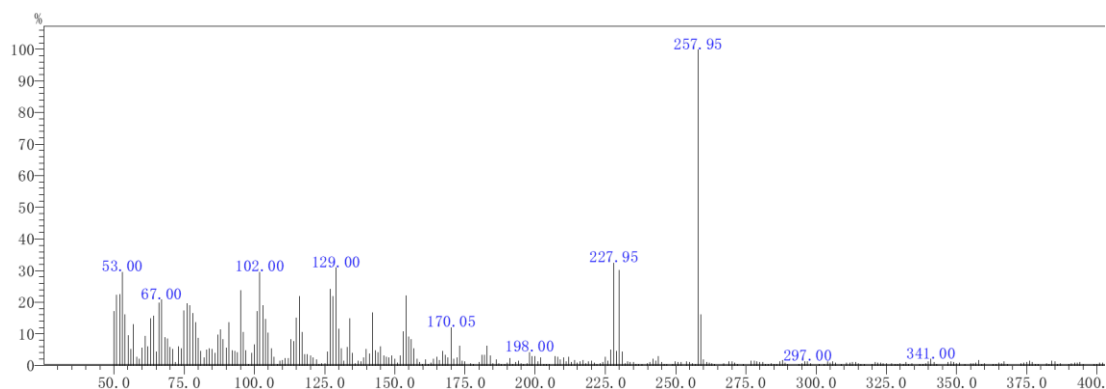

Figure S27 EI/MS spectra of NBD-O.

Table S2 The main crystallographic parameters of NBD-O

| Identification code                            | NBD-O                                                            |
|------------------------------------------------|------------------------------------------------------------------|
| Empirical formula                              | $\text{C}_{11}\text{H}_8\text{N}_4\text{O}_5$                    |
| Formula weight                                 | 276.21                                                           |
| Temperature/K                                  | 296.15                                                           |
| Crystal system                                 | orthorhombic                                                     |
| Space group                                    | Pbca                                                             |
| a/Å                                            | 13.774(2)                                                        |
| b/Å                                            | 6.9990(11)                                                       |
| c/Å                                            | 23.662(4)                                                        |
| $\alpha/^\circ$                                | 90                                                               |
| $\beta/^\circ$                                 | 90                                                               |
| $\gamma/^\circ$                                | 90                                                               |
| Volume/Å <sup>3</sup>                          | 2281.1(6)                                                        |
| Z                                              | 8                                                                |
| $\rho_{\text{calc}}/\text{cm}^3$               | 1.609                                                            |
| $\mu/\text{mm}^{-1}$                           | 0.131                                                            |
| F(000)                                         | 1136.0                                                           |
| Crystal size/mm <sup>3</sup>                   | 0.3 × 0.2 × 0.1                                                  |
| Radiation                                      | MoK $\alpha$ ( $\lambda = 0.71073$ )                             |
| 2 $\Theta$ range for data collection/ $^\circ$ | 4.538 to 60.87                                                   |
| Index ranges                                   | -13 ≤ h ≤ 19, -9 ≤ k ≤ 9, -33 ≤ l ≤ 33                           |
| Reflections collected                          | 16732                                                            |
| Independent reflections                        | 3339 [ $R_{\text{int}} = 0.0265$ , $R_{\text{sigma}} = 0.0206$ ] |
| Data/restraints/parameters                     | 3339/0/184                                                       |
| Goodness-of-fit on $F^2$                       | 1.041                                                            |
| Final R indexes [ $I > 2\sigma(I)$ ]           | $R_1 = 0.0424$ , $wR_2 = 0.1368$                                 |

|                                               |                                  |
|-----------------------------------------------|----------------------------------|
| Final R indexes [all data]                    | $R_1 = 0.0639$ , $wR_2 = 0.1533$ |
| Largest diff. peak/hole / e $\text{\AA}^{-3}$ | 0.25/-0.18                       |

**Table S3** The main crystallographic parameters of **NBD-G**

| Identification code                            | <b>NBD-G</b>                                                     |
|------------------------------------------------|------------------------------------------------------------------|
| Empirical formula                              | $C_{11}H_6N_4O_4$                                                |
| Formula weight                                 | 258.20                                                           |
| Temperature/K                                  | 296.15                                                           |
| Crystal system                                 | orthorhombic                                                     |
| Space group                                    | Pbca                                                             |
| a/ $\text{\AA}$                                | 8.7743(5)                                                        |
| b/ $\text{\AA}$                                | 11.8277(7)                                                       |
| c/ $\text{\AA}$                                | 21.4669(13)                                                      |
| $\alpha/^\circ$                                | 90                                                               |
| $\beta/^\circ$                                 | 90                                                               |
| $\gamma/^\circ$                                | 90                                                               |
| Volume/ $\text{\AA}^3$                         | 2227.8(2)                                                        |
| Z                                              | 8                                                                |
| $\rho_{\text{calc}}/\text{g/cm}^3$             | 1.540                                                            |
| $\mu/\text{mm}^{-1}$                           | 0.122                                                            |
| F(000)                                         | 1056.0                                                           |
| Crystal size/ $\text{mm}^3$                    | 0.1 × 0.05 × 0.05                                                |
| Radiation                                      | MoK $\alpha$ ( $\lambda = 0.71073$ )                             |
| 2 $\Theta$ range for data collection/ $^\circ$ | 3.794 to 55.194                                                  |
| Index ranges                                   | -6 ≤ h ≤ 11, -15 ≤ k ≤ 13, -19 ≤ l ≤ 26                          |
| Reflections collected                          | 9910                                                             |
| Independent reflections                        | 2319 [ $R_{\text{int}} = 0.0245$ , $R_{\text{sigma}} = 0.0281$ ] |
| Data/restraints/parameters                     | 2319/0/173                                                       |
| Goodness-of-fit on $F^2$                       | 1.004                                                            |
| Final R indexes [ $l > 2\sigma(l)$ ]           | $R_1 = 0.0406$ , $wR_2 = 0.0937$                                 |
| Final R indexes [all data]                     | $R_1 = 0.0831$ , $wR_2 = 0.1123$                                 |
| Largest diff. peak/hole / e $\text{\AA}^{-3}$  | 0.14/-0.15                                                       |

**Table S4** The main crystallographic parameters of **CB[8]·NBDP<sub>2</sub>**

| compound                                       | <b>CB[8]·NBDP<sub>2</sub></b>            |
|------------------------------------------------|------------------------------------------|
| Empirical formula                              | $C_{70}H_{60}N_{40}O_{24}$               |
| Formula weight                                 | 1845.58                                  |
| Temperature/K                                  | 296.15                                   |
| Crystal system                                 | monoclinic                               |
| Space group                                    | P2 <sub>1</sub> /c                       |
| a/ $\text{\AA}$                                | 13.794(3)                                |
| b/ $\text{\AA}$                                | 19.827(5)                                |
| c/ $\text{\AA}$                                | 16.822(4)                                |
| $\alpha/^\circ$                                | 90                                       |
| $\beta/^\circ$                                 | 104.599(7)                               |
| $\gamma/^\circ$                                | 90                                       |
| Volume/ $\text{\AA}^3$                         | 4452.1(17)                               |
| Z                                              | 2                                        |
| $\rho_{\text{calc}}/\text{g/cm}^3$             | 1.377                                    |
| $\mu/\text{mm}^{-1}$                           | 0.108                                    |
| F(000)                                         | 1904.0                                   |
| Crystal size/ $\text{mm}^3$                    | 0.1 × 0.1 × 0.1                          |
| Radiation                                      | MoK $\alpha$ ( $\lambda = 0.71073$ )     |
| 2 $\Theta$ range for data collection/ $^\circ$ | 4.108 to 50                              |
| Index ranges                                   | -16 ≤ h ≤ 15, -23 ≤ k ≤ 23, -19 ≤ l ≤ 20 |

|                                                |                                                                  |
|------------------------------------------------|------------------------------------------------------------------|
| Reflections collected                          | 27742                                                            |
| Independent reflections                        | 7783 [ $R_{\text{int}} = 0.0938$ , $R_{\text{sigma}} = 0.0955$ ] |
| Data/restraints/parameters                     | 7783/0/604                                                       |
| Goodness-of-fit on $F^2$                       | 1.114                                                            |
| Final R indexes [ $I \geq 2\sigma(I)$ ]        | $R_1 = 0.1090$ , $wR_2 = 0.2652$                                 |
| Final R indexes [all data]                     | $R_1 = 0.1385$ , $wR_2 = 0.2868$                                 |
| Largest diff. peak/hole / $e \text{ \AA}^{-3}$ | 0.57/-0.48                                                       |

---

## References

- [1] A. Day, A.P. Arnold, R.J. Blanch and B. Snushall, *J. Org. Chem.* 2001, **66**, 8094–8100
- [2] T. Lu and F. Chen, *J. Comput. Chem.* 2012, **33**, 580-592
- [3] W. Humphrey, A. Dalke and K. Schulten, *J. Mol. Graphics Modell.* 1996, **14**, 33-38
